# Supplementary material for: An experimental, theoretical and kinetic-modeling study of the gas-phase oxidation of ammonia
Source: Royal Society of Chemistry journal article supplement (doi:10.1039/c9re00429g), 2020-01-01
Supplement: c9re00429g2.zip [file c9re00429g2.zip]

## Sheet: JSR Data
Combustion and pyrolysis of neat ammonia
Operating conditions
Xnh3		500 ppm
XO2		0.00; 0.02; 0.04
Temperature (K)		500 - 1200
P (Torr)		800
T (K)	NH3 (ppm)			NO (ppm)			NO2 (ppm)*
	O2=2%	O2=4%	Pyrolysis	O2=2%	O2=4%	Pyrolysis	O2=2%	O2=4%	Pyrolysis
500	503.66	503.748	507.746
525
550
575
600	501.447		507.836
625
650
675
700	496.508		501.71
725
750	496.575		496.992
775
800	498.435		502.746
825
850
875
900	501.677		504.898		0.828			0
925
950	506.922		507.636	0.151	1.094		0	0
975
1000	495.283	493.755	498.353	0.249	1.337		0	0
1025		492.851
1050	490.514	484.709	494.429		1.565			0
1075		483.104
1100	493.028	466.998	498.264	1.03	4.14		0	0
1125				1.845	4.52		0	0
1150	438.84	392.539	503.308	1.845	5.14		0	0
1175				2.311			0
1200	274.223	109.654	497.029	3.09	5.33		0	0

## Sheet: FR Data
Oxidation of NH3
P = 950 Torr
x NH3 in = 1000 ppm
x O2 in = 2000 ppm
residence time is about 50 ms
T(°C)	T (K)	NH3 (ppm)	O2 (ppm)	NO (ppm)	N2 (ppm)	H2O (ppm)	H2 (ppm)		N balance	H balance	O balance
800	1073.15	992.982	1968.13	0.308564	2.03922	74.2574	0		99.7369	104.249	100.27
850	1123.15	1017.54	1980.08	0.367266	1.69935	44.5545	0		102.131	104.725	100.126
900	1173.15	982.456	1972.11	0.496055	2.03922	14.8515	0		98.7031	99.2357	98.9874
950	1223.15	989.474	1952.19	0.692354	0.339869	8.91089	0		99.0846	99.5414	97.8464
1000	1273.15	971.93	2000	0.910152	3.05882	0	0		97.8958	97.193	100.018
1050	1323.15	957.895	2000	1.23981	6.11765	2.9703	0		97.137	95.9875	100.098
1100	1373.15	1000	1928.29	1.6242	17.6732	14.8515	0		103.697	100.99	96.815
1150	1423.15	852.632	2023.9	2.14228	51.6601	86.1386	18.5914		95.8094	92.2452	103.386
1200	1473.15	350.877	1569.72	5.24903	171.242	510.891	52.9856		69.861	72.6795	91.3468
1250	1523.15	0	1505.98	16.4361	380.654	864.356	0		77.7743	57.6238	97.1757
1300	1573.15	0	1219.12	81.5968	475.817	1476.24	0		103.323	98.4158	99.1501
1350	1623.15	0	1211.16	107.983	513.203	1500	0		113.439	100	99.7098
1400	1673.15	0	1191.24	130.175	451.242	1500	0		103.266	100	98.9938
1450	1723.15	0	1190.28	150.969	426.144	1627.55	0		100.326	108.503	102.379
1500	1773.15	0	1174.09	163.547	418.301	1576.53	0		100.015	105.102	100.408
1550	1823.15	0	1174.09	178.027	407.843	1500	0		99.3713	100	98.6293
1600	1873.15	0	1157.89	184.81	405.229	1500	0		99.5268	100	97.8447
1650	1923.15	0	1153.85	188.442	405.229	1500	0		99.89	100	97.6255
1700	1973.15	0	1157.89	194.231	400	1474.49	0		99.4231	98.2993	97.2014

## Sheet: FR Inlet Flows
Inlet flow rate calculation
													inlet flow rate in normal conditions
													nmL/min	nL/min	nL/min	nmL/min	nL/min	nL/min	nL/min
T(°C)	T(K)	P (Bar)	Tau (s)	V (cm3)	Q (m3/s)	F (mol/s)	x NH3	x O2	x HE	F NH3	F O2	F HE	Q NH3 in	Q He+NH3 in	Q He-NH3 in	Q O2 in	Q He tot in	Q He add in	Q tot in
500	773.15	1.1999	0.05	3.76991	7.53982e-05	0.00140745	0.001	0.002	0.997	1.40745e-06	2.8149e-06	0.00140323	1.91776	0.958882	0.956965	3.83553	1.91201	0.955047	1.91585
550	823.15	1.1999	0.05	3.76991	7.53982e-05	0.00132196	0.001	0.002	0.997	1.32196e-06	2.64392e-06	0.00131799	1.80128	0.900638	0.898836	3.60255	1.79587	0.897035	1.79947
600	873.15	1.1999	0.05	3.76991	7.53982e-05	0.00124626	0.001	0.002	0.997	1.24626e-06	2.49251e-06	0.00124252	1.69813	0.849064	0.847366	3.39625	1.69303	0.845667	1.69643
650	923.15	1.1999	0.05	3.76991	7.53982e-05	0.00117876	0.001	0.002	0.997	1.17876e-06	2.35751e-06	0.00117522	1.60615	0.803076	0.80147	3.21231	1.60133	0.799864	1.60455
700	973.15	1.1999	0.05	3.76991	7.53982e-05	0.00111819	0.001	0.002	0.997	1.11819e-06	2.23639e-06	0.00111484	1.52363	0.761815	0.760291	3.04726	1.51906	0.758767	1.52211
750	1023.15	1.1999	0.05	3.76991	7.53982e-05	0.00106355	0.001	0.002	0.997	1.06355e-06	2.1271e-06	0.00106036	1.44917	0.724586	0.723137	2.89834	1.44482	0.721687	1.44772
800	1073.15	1.1999	0.05	3.76991	7.53982e-05	0.001014	0.001	0.002	0.997	1.014e-06	2.02799e-06	0.00101095	1.38165	0.690826	0.689444	2.7633	1.37751	0.688063	1.38027
850	1123.15	1.1999	0.05	3.76991	7.53982e-05	0.000968855	0.001	0.002	0.997	9.68855e-07	1.93771e-06	0.000965949	1.32014	0.660072	0.658752	2.64029	1.31618	0.657432	1.31882
900	1173.15	1.1999	0.05	3.76991	7.53982e-05	0.000927562	0.001	0.002	0.997	9.27562e-07	1.85512e-06	0.00092478	1.26388	0.63194	0.630676	2.52776	1.26009	0.629412	1.26262
950	1223.15	1.1999	0.05	3.76991	7.53982e-05	0.000889645	0.001	0.002	0.997	8.89645e-07	1.77929e-06	0.000886976	1.21221	0.606107	0.604895	2.42443	1.20858	0.603683	1.211
1000	1273.15	1.1999	0.05	3.76991	7.53982e-05	0.000854707	0.001	0.002	0.997	8.54707e-07	1.70941e-06	0.000852142	1.16461	0.582304	0.581139	2.32921	1.16111	0.579974	1.16344
1050	1323.15	1.1999	0.05	3.76991	7.53982e-05	0.000822408	0.001	0.002	0.997	8.22408e-07	1.64482e-06	0.000819941	1.1206	0.560299	0.559179	2.2412	1.11724	0.558058	1.11948
1100	1373.15	1.1999	0.05	3.76991	7.53982e-05	0.000792462	0.001	0.002	0.997	7.92462e-07	1.58492e-06	0.000790085	1.07979	0.539897	0.538817	2.15959	1.07656	0.537738	1.07871
1150	1423.15	1.1999	0.05	3.76991	7.53982e-05	0.000764621	0.001	0.002	0.997	7.64621e-07	1.52924e-06	0.000762327	1.04186	0.520929	0.519887	2.08372	1.03873	0.518845	1.04082
1200	1473.15	1.1999	0.05	3.76991	7.53982e-05	0.000738669	0.001	0.002	0.997	7.38669e-07	1.47734e-06	0.000736453	1.0065	0.503248	0.502242	2.01299	1.00348	0.501235	1.00549
1250	1523.15	1.1999	0.05	3.76991	7.53982e-05	0.000714421	0.001	0.002	0.997	7.14421e-07	1.42884e-06	0.000712277	0.973456	0.486728	0.485755	1.94691	0.970536	0.484781	0.972483
1300	1573.15	1.1999	0.05	3.76991	7.53982e-05	0.000691714	0.001	0.002	0.997	6.91714e-07	1.38343e-06	0.000689639	0.942517	0.471258	0.470316	1.88503	0.939689	0.469373	0.941574
1350	1623.15	1.1999	0.05	3.76991	7.53982e-05	0.000670406	0.001	0.002	0.997	6.70406e-07	1.34081e-06	0.000668395	0.913483	0.456741	0.455828	1.82697	0.910742	0.454915	0.912569
1400	1673.15	1.1999	0.05	3.76991	7.53982e-05	0.000650372	0.001	0.002	0.997	6.50372e-07	1.30074e-06	0.000648421	0.886185	0.443092	0.442206	1.77237	0.883526	0.44132	0.885298
1450	1723.15	1.1999	0.05	3.76991	7.53982e-05	0.0006315	0.001	0.002	0.997	6.315e-07	1.263e-06	0.000629606	0.860471	0.430235	0.429375	1.72094	0.857889	0.428514	0.85961
1500	1773.15	1.1999	0.05	3.76991	7.53982e-05	0.000613693	0.001	0.002	0.997	6.13693e-07	1.22739e-06	0.000611852	0.836207	0.418103	0.417267	1.67241	0.833698	0.416431	0.83537
1550	1823.15	1.1999	0.05	3.76991	7.53982e-05	0.000596862	0.001	0.002	0.997	5.96862e-07	1.19372e-06	0.000595072	0.813274	0.406637	0.405824	1.62655	0.810834	0.40501	0.81246
1600	1873.15	1.1999	0.05	3.76991	7.53982e-05	0.00058093	0.001	0.002	0.997	5.8093e-07	1.16186e-06	0.000579188	0.791565	0.395782	0.394991	1.58313	0.78919	0.394199	0.790773
1650	1923.15	1.1999	0.05	3.76991	7.53982e-05	0.000565827	0.001	0.002	0.997	5.65827e-07	1.13165e-06	0.000564129	0.770985	0.385493	0.384722	1.54197	0.768672	0.383951	0.770214
1700	1973.15	1.1999	0.05	3.76991	7.53982e-05	0.000551489	0.001	0.002	0.997	5.51489e-07	1.10298e-06	0.000549834	0.751448	0.375724	0.374973	1.5029	0.749194	0.374221	0.750697
1750	2023.15	1.1999	0.05	3.76991	7.53982e-05	0.000537859	0.001	0.002	0.997	5.37859e-07	1.07572e-06	0.000536246	0.732877	0.366438	0.365706	1.46575	0.730678	0.364973	0.732144
1800	2073.15	1.26656	0.05	3.76991	7.53982e-05	0.000554047	0.001	0.002	0.997	5.54047e-07	1.10809e-06	0.000552385	0.754935	0.377467	0.376712	1.50987	0.75267	0.375958	0.75418

## Sheet: FR T Profiles
! Temperatures are in °C
	1000	1050	1100	1150	1200	1250	1300	1350	1400	1450	1500	1550	1600	1650	1700
Distance / cm	Temperature / C	Temperature / C	Temperature / C	Temperature / C	Temperature / C	Temperature / C	Temperature / C	Temperature / C	Temperature / C	Temperature / C	Temperature / C	Temperature / C	Temperature / C	Temperature / C	Temperature / C
0	25	25	25	40	55	60	65	70	75	87	99	123	148	195	241
5	25	25	26	40	54	68	82	96	110	111	111	139	166	222	277
10	25	25	60	80	68	106	144	182	220	221	222	266	309	378	447
15	63	91	118	146	174	201	229	257	284	321	357	404	451	509	566
20	109	163	216	269	322	375	428	481	534	555	575	632	689	766	842
25	440	507	574	641	708	775	842	909	976	1061	1145	1206	1266	1338	1409
30	649	719	789	859	929	999	1069	1139	1209	1281	1352	1411	1469	1527	1584
34	904	959	1014	1069	1125	1180	1174	1238	1301	1363	1425	1480	1534	1587	1639
36	937	990	1044	1097	1151	1204	1223	1284	1344	1403	1461	1516	1570	1620	1669
38	955	1008	1061	1113	1166	1218	1247	1306	1364	1421	1478	1530	1582	1632	1681
40	969	1021	1073	1125	1176	1228	1260	1318	1376	1431	1486	1538	1589	1638	1687
42	979	1030	1081	1132	1183	1234	1270	1327	1383	1437	1490	1541	1592	1641	1689
44	985	1035	1086	1137	1187	1238	1279	1333	1387	1440	1493	1543	1593	1642	1691
46	985	1036	1087	1137	1188	1238	1284	1337	1389	1442	1494	1544	1594	1643	1691
48	986	1037	1087	1137	1188	1238	1286	1338	1389	1441	1493	1543	1593	1642	1691
50	985	1035	1085	1136	1186	1236	1286	1337	1388	1440	1492	1542	1591	1640	1689
52	980	1030	1080	1130	1181	1231	1284	1335	1386	1438	1489	1539	1589	1638	1686
54	971	1022	1072	1123	1173	1223	1280	1331	1381	1433	1484	1534	1584	1633	1682
56	956	1007	1057	1108	1159	1209	1272	1323	1373	1425	1477	1527	1577	1626	1674
58	923	974	1026	1077	1128	1179	1258	1309	1359	1412	1464	1514	1564	1613	1661
60	865	916	968	1020	1072	1124	1231	1282	1332	1385	1437	1489	1540	1590	1639
62	781	822	863	904	945	986	1185	1231	1276	1330	1384	1437	1490	1540	1589
64	702	736	769	803	836	870	1045	1073	1101	1149	1197	1235	1273	1314	1355
66	625	655	686	717	748	779	903	935	968	1005	1042	1073	1104	1137	1170
68	558	586	615	643	672	701	802	836	870	907	943	968	992	1025	1057
70	498	525	553	580	608	635	717	751	785	819	852	874	896	926	956
72	438	465	492	519	546	574	655	685	714	748	782	803	823	852	880
74	332	352	372	391	411	431	591	623	654	685	716	740	764	790	815
80	256	268	280	292	304	316	458	472	486	509	532	554	575	589	603
85	221	228	235	241	248	255	357	354	350	364	378	389	399	411	423
90	170	174	179	183	187	191	271	273	274	284	293	298	302	310	318
95	145	150	154	159	164	167	203	202	201	208	216	218	220	224	228
100	120	125	130	135	140	143	145	148	150	153	155	158	160	160	159
